# Supplementary material for: Genome engineering in the yeast pathogen Candida glabrata using the CRISPR-Cas9 system
Source: PubMed Central journal article supplement (PMC5073330; doi:10.1038/srep35766), 2016-10-21
Supplement: srep35766-s1.pdf [file srep35766-s1.pdf]

1 **Genome engineering in the yeast pathogen *Candida glabrata* using the CRISPR-Cas9**  
2 **system.**

3 **L. Enkler, D. Richer, A. Marchand, D. Ferrandon and F. Jossinet**

4

5 This supplementary materials section contains additional information to the methods and materials  
6 provided in the main article.

7 **Supplementary Methods**

8 **Strains and media.** The reference strain of *C. glabrata* used in this study was the CBS138 (ATC2001)  
9 strain deleted in the histidine (*HIS3*), tryptophan (*TRP1*) and leucine (*LEU2*) loci ( $\Delta$ HTL) (34). All strains  
10 engineered in this study were derivative of the  $\Delta$ HTL strain and are listed in the Supplementary Table  
11 S1. *C. glabrata* was grown either in rich or synthetic medium. Rich media (YPD) were as follow: 1%  
12 (w/v) yeast extract (Carl Roth GmbH), 2% (w/v) peptone (Carl Roth GmbH) and 2% (w/v) glucose  
13 (Sigma Aldrich). Synthetic media (SC) were as follow: 0,67% (w/v) yeast nitrogen base with ammonium  
14 sulfate (MP Biomedicals), supplemented with the appropriate complete supplement mixture of amino  
15 acids (CSM, MP Biomedicals) and 2% (w/v) glucose. SC glucose media (SCGlc) were equilibrated at  
16 pH 5.5 with NaOH, YPD media were equilibrated at pH 5.5 with HCl. For solid media, YPD or SCGlc  
17 were supplemented with 1.4% (w/v) agar (Carl Roth GmbH).

18 **Growth conditions and monitoring of generation time.** Strains in liquid media were grown at 30 °C  
19 in an Infors HT with a rotational shaking at 130 rpm. For drop test analysis, each strain was grown to  
20 exponential phase over night and diluted in deionized water and a 7 $\mu$ L drop was plated onto SCGlc or  
21 YPD solid media with or without appropriate amino acids. Plates were then incubated at 30 °C for 1 to  
22 4 days. For growth curve analysis, strains were grown to exponential phase, diluted to the appropriate  
23 OD<sub>600nm</sub> in 50 mL of SCGlc (+/- adequate amino acids) and growth was monitored over a period of 30  
24 hours. Generation times were calculated using the exponential phase of our growth curves. Mean time  
25 generation and standard error to the mean (SEM) were calculated using GraphPad Prism6. *C. glabrata*  
26 strains used for infection were grown to stationary phase in YPD.

27 **C. glabrata transformation.** *C. glabrata* transformation was done as follow: first a single colony of each  
28 strain was grown in a 20 mL SCGlc, SCGlc -W, -L or -L-W pre-culture depending on the strains. Once  
29 in stationary phase, a 50 mL culture was seeded and grown until exponential phase (1.3-1.5 OD<sub>600nm</sub>).  
30 Then cells were pelleted at 3,000 xg for 5 min, washed with 1 volume of deionized water, resuspended  
31 in 25 mL of TELiA buffer (10mM Tris-HCl pH8, 1mM EDTA, 100 mM LiAC) and incubated at 30 °C for  
32 30 min at 130 rpm. After that, 250 $\mu$ L of 1M DTT was added to the culture and incubated for 1 more  
33 hour. Then, 20 mL of deionized water was added to the culture and cells were pelleted at 1,000 xg for  
34 5 min at 4 °C, washed once with 1 volume of deionized water and once with 5 mL of Sorbitol 1M. Finally,  
35 cells were resuspended in 550 $\mu$ L of sorbitol 1M. For each transformation, a 40 $\mu$ L aliquot of cells was  
36 taken and mixed with 1 $\mu$ g of plasmid, incubated 10 min on ice and transformed by electroporation at

1 200V, 1.5 kW, 25 mF. Recovery was carried out by adding 950 $\mu$ L of YPD and incubation at 30 °C for  
2 4h at 130 rpm. After that, cells were harvested at 3,000 xg for 5 min, resuspended in 100 $\mu$ L of deionized  
3 water and plated onto appropriate media.

4 **Design and synthesis of donor DNAs.** XTAG donor DNA was produced by PCR using the pU1- and  
5 pD1-XTAG primers (Supplementary Table S3). Addition of 20bp flanking region of the *ADE2* locus at  
6 sgADE2.1 cut site was done by PCR using the previous XTAG PCR as matrix and the pAU1- and pAD1-  
7 ADE2 primers. Synthesis of the 200bp flanking regions of *ADE2* cut site were achieved by two  
8 separated PCR reactions using genomic DNA as template and the primer pairs pAU2-ADE2 and pAS-  
9 HD ADE2 for the 5' upstream region and pAD2-ADE2 and pS1-HD ADE2 for the 3' upstream region.  
10 The resulting PCR products were added to the XTAG-20bp cassette by Gibson assembly (NEB)  
11 following manufacturer's instruction.

12 *HIS3* donor DNA bearing 20bp of HD was produced in a two steps experiment: first we amplified two  
13 fragments of *HIS3* with 20bp of overlapping nucleotides with the primer pair pAU3-ADE2 and pAS1-  
14 HIS3 and the pair pS1-HIS3 and pAD3-ADE2. These fragments were then combined by Gibson  
15 assembly. HIS3-200bp HD was synthesized by association of the HIS3-20bp cassette with the previous  
16 5' upstream and the 3' upstream region used for XTAG-200bp HD synthesis.

17 *HIS3* donor DNA used for *VPK1* disruption was generated by PCR reaction using the VPK1-HIS3-Fwd  
18 and Rev primers and CBS138 genomic DNA as matrix. Both primers contain 20bp of homology with  
19 the *VPK1* cutting site for homologous recombination.

20 Each donor DNA were either purified by the Wizard SV Gel and PCR clean-up system (Promega) when  
21 no aspecific bands were amplified during PCR, or the band of interest was cut out from the gel and  
22 DNA was extracted by electrolysis in dialysis membrane (Carl Roth GmbH) at 110V for 30 min and 30  
23 sec with reverse voltage. DNA was then subjected to phenol-chloroform extraction, precipitated with  
24 0.2 volume of 3M AcNH<sub>4</sub> and 1 mL of isopropanol, and the pelleted DNA resuspended in deionized  
25 water.

26 **Homologous recombination in *C. glabrata*.** Transformations were done as described above with a  
27 slight modification. During the 10 min incubation on ice, a mix of 1 $\mu$ g of donor DNA and 1 $\mu$ g of pRS314-  
28 CAS9 was added to the  $\Delta$ HTL + sgADE2.1 strain. Insertion of the donor DNA at the *ADE2* locus was  
29 checked by colony-PCR using the ADE2-Fwd and either pD1-XTAG (for XTAG insertion) or pSeqHIS3-  
30 Rev (for *HIS3* insertion) on colonies grown on SCGlc -L -W. Recombination frequency was calculated  
31 as the number of clones containing donor DNA divided by the number of colonies tested recovered on  
32 selective medium. Statistical significance was calculated with an unpaired *t* test using GraphPad  
33 PRISM6 software, and *p* < 0.05 was considered significant, at least 200 clones were tested.

34 **Genomic DNA preparation.** Genomic DNA from each strain was prepared by harvesting 1 mL of cells  
35 grown to exponential phase followed by 5 min at 2,000 xg centrifugation. The pellet was resuspended  
36 in 200 $\mu$ L of lysis buffer (2% Triton X-100, 1% SDS, 100 mM NaCl, 10 mM Tris-HCl pH 8.0, 1 mM EDTA,  
37 pH 8.0) by vortexing. Tubes were then immersed in a dry ice/ethanol bath for 2 minutes, transferred to

1 a 95°C water bath for 1 min, vortexed for 10 sec and the procedure was repeated once. 200µL of  
2 chloroform was added to each tubes, which was then shaken by vortexing 2 min and centrifuged for 20  
3 min at 20,000 *xg*. The upper aqueous phase was transferred to a fresh microcentrifuge tube containing  
4 400µL of isopropanol. Nucleic acids were precipitated by incubating for 30 min at -80°C and were then  
5 pelleted by centrifugation at 20,000 *xg* for 30 min at 4 °C. DNA concentration were measured and each  
6 genomic DNA preparation was adjusted to a 50 ng/µL concentration for further Surveyor assay and  
7 sequencing.

8 **Surveyor assays and sequencing.** For surveyor assays, *ADE2* genomic locus of the ΔHTL reference  
9 strain and disrupted strains was subjected to PCR using the *ADE2*-Fwd and Rev primers and the  
10 Phusion DNA polymerase (Thermo Scientific) (Supplementary Table S3). Following this, PCR products  
11 were purified on the Wizard SV Gel and PCR clean-up system (Promega), adjusted to 20 ng/µL and  
12 Surveyor assay was performed according to manufacturer's instructions. Briefly, 9µL of PCR products  
13 from ΔHTL strain were mixed with 9µL of the PCR products obtained from strains ΔHTL + *CAS9* (*TEF1*  
14 and *CYC1*), ΔHTL + sg*ADE2.1* and ΔHTL + sg*ADE2.3* or any combination possible and supplemented  
15 with 2µL of Taq DNA polymerase PCR buffer (Thermo Scientific). Products were then annealed  
16 following a succession of decreasing temperature ranging from 95 to 4 °C (95 °C during 10 sec, 95 to  
17 85 °C with -2 °C/sec, 85 °C for 1 min, 85 to 75 °C with -0.3 °C/sec, 75 °C for 1 min, 75 to 65 °C with -  
18 0.3 °C/sec, 65 °C for 1 min, 65 to 55 °C with -0.3 °C/sec, 55 °C for 1 min, 55 to 45 °C with -0.3 °C/sec,  
19 45 °C for 1 min, 45 to 35 °C with -0.3 °C/sec, 35 °C for 1 min, 35 to 25 °C with -0.3 °C/sec, 25 °C for 1  
20 min, and finally 25 to 4 °C with -0.3 °C/sec. After, 2.5µL MgCl<sub>2</sub>(0.15M) + 2µL of Nuclease S and 1µL of  
21 Enhancer S (Surveyor Mutation Detector Kit, IdT) were added to the 20µL reaction and incubated at 42  
22 °C for 1 hour. Then 4µL of DNA loading buffer (Thermo Scientific) was added and loaded into a 10%  
23 TBE-Polyacrylamide gel.

24 For sequencing, PCR was performed with the Phusion DNA polymerase using different couples of  
25 primers described in Supplementary Table S3 and purified on the Wizard SV Gel and PCR clean-up  
26 system (Promega). For *ADE2*, we used the *ADE2*-Fwd and Rev primers, for *XTAG* insertion *ADE2*-  
27 Fwd-pD1-*XTAG* and *ADE2*-Rev-pU1-*XTAG*, for *HIS3* insertion we used *ADE2*-Fwd-pSeq*HIS3*-Rev and  
28 *ADE2*-Rev-pSeq*HIS3*-Fwd, for *YPS11* we used *YPS11*-Fwd and -Rev. *VPK1* indels were checked  
29 using the *VPK1*-Fwd and -Rev primers. *VPK1* disruption following *HIS3* recombination was checked  
30 using the *VPK1*-Fwd and the pSeq*HIS3*-Rev primer pair.

31 **Saturation of phagocytosis.** In order to ablate phagocytosis, we used surfactant-free white, 0.3-mm  
32 diameter carboxylate-modified latex beads (Interfacial Dynamics). Beads were washed in PBS and  
33 used 4 times concentrated in PBS (corresponding to 5–10% solids), and we then injected 69 nl of beads  
34 24 hours before septic injury.

1 **Supplementary Table S1. Strains used in this study**

2

| Strain                            | Genotype                                                                                            | Auxotrophies                   | Origin                |
|-----------------------------------|-----------------------------------------------------------------------------------------------------|--------------------------------|-----------------------|
| ΔHTL                              | <i>his3Δ::FRT ; leu2Δ::FRT ; trp1Δ::FRT</i>                                                         | histidine, leucine, tryptophan | Jacobsen et al., 2010 |
| ΔHTL+sgADE2.1                     | <i>his3Δ::FRT ; leu2Δ::FRT ; trp1Δ::FRT + pRS315-pRNAH1-sgADE2.1-tTY2</i>                           | histidine, tryptophan          | This study            |
| ΔHTL+sgADE2.3                     | <i>his3Δ::FRT ; leu2Δ::FRT ; trp1Δ::FRT + pRS315-pSNR52-sgADE2.3-tTY2</i>                           | histidine, tryptophan          | This study            |
| ΔHTL+CAS9( <i>TEF1</i> )          | <i>his3Δ::FRT ; leu2Δ::FRT ; trp1Δ::FRT + pRS314-pTEF1-CAS9-tCYC1</i>                               | histidine, leucine             | This study            |
| ΔHTL+CAS9( <i>CYC1</i> )          | <i>his3Δ::FRT ; leu2Δ::FRT ; trp1Δ::FRT + pRS314-pCYC1-CAS9-tCYC1</i>                               | histidine, leucine             | This study            |
| ΔHTL+sgADE2.1+CAS9( <i>TEF1</i> ) | <i>his3Δ::FRT ; leu2Δ::FRT ; trp1Δ::FRT + pRS314-pTEF1-CAS9-tCYC1+ pRS315-pRNAH1-sgADE2.1-tTY2</i>  | histidine                      | This study            |
| ΔHTL+sgADE2.1+CAS9( <i>CYC1</i> ) | <i>his3Δ::FRT ; leu2Δ::FRT ; trp1Δ::FRT + pRS314-pCYC1-CAS9-tCYC1+ pRS315-pRNAH1-sgADE2.1-tTY2</i>  | histidine                      | This study            |
| ΔHTL+sgADE2.3+CAS9( <i>TEF1</i> ) | <i>his3Δ::FRT ; leu2Δ::FRT ; trp1Δ::FRT + pRS314-pTEF1-CAS9-tCYC1+ pRS315-pSNR52-sgADE2.3-tTY2</i>  | histidine                      | This study            |
| ΔHTL+sgADE2.3+CAS9( <i>CYC1</i> ) | <i>his3Δ::FRT ; leu2Δ::FRT ; trp1Δ::FRT + pRS314-pCYC1-CAS9-tCYC1 + pRS315-pSNR52-sgADE2.3-tTY2</i> | histidine                      | This study            |
| <i>yps11</i>                      | <i>his3Δ::FRT ; leu2Δ::FRT ; trp1Δ::FRT yps11</i>                                                   | histidine, leucine, tryptophan | This study            |

|                   |                                                        |                                |            |
|-------------------|--------------------------------------------------------|--------------------------------|------------|
| <i>vpk1</i>       | <i>his3Δ::FRT ; leu2Δ::FRT ; trp1Δ::FRT vpk1</i>       | histidine, leucine, tryptophan | This study |
| <i>vpk1::HIS3</i> | <i>his3Δ::FRT ; leu2Δ::FRT ; trp1Δ::FRT vpk1::HIS3</i> | leucine, tryptophan            | This study |

1  
2  
3  
4  
5

**Supplementary Table S2. Plasmids used in this study**

| Name                      | Backbone | Auxotrophic marker | Promoter | Gene     | Terminator | Origin               |
|---------------------------|----------|--------------------|----------|----------|------------|----------------------|
| p414- <i>CAS9(TEF1)</i>   | p414     | TRP1               | scTEF1   | CAS9     | scCYC1     | DiCarlo et al., 2013 |
| pRS314- <i>CAS9(CYC1)</i> | pRS314   | TRP1               | cgCYC1   | CAS9     | scCYC1     | This study           |
| pRS315- <i>sgADE2.1</i>   | pRS315   | LEU2               | cgRNAH1  | sgADE2.1 | cgTY2      | This study           |
| pRS315- <i>sgADE2.3</i>   | pRS315   | LEU2               | scSNR52  | sgADE2.3 | scTY2      | This study           |
| pRS315- <i>sgYPS11</i>    | pRS315   | LEU2               | cgRNAH1  | sgYPS11  | cgTY2      | This study           |
| pRS315- <i>sgVPK1</i>     | pRS315   | LEU2               | cgRNAH1  | sgVPK1   | cgTY2      | This study           |

6  
7  
8  
9  
10  
11  
12  
13  
14  
15  
16  
17  
18

sc: *Saccharomyces cerevisiae*; cg: *Candida glabrata*; sg: single guide

1 **Supplementary Table S3. Oligonucleotides used for sequencing and amplification of sgRNAs.**

2

| Oligonucleotides names | Sequences                                        |
|------------------------|--------------------------------------------------|
| ADE2-Fwd               | GCCGACATCCTTACGTAGGG                             |
| ADE2-Rev               | GAGGTCTGGGTGCAATTTTCATTC                         |
| CYC1-Fwd               | CGGCCGCTCTAGAACTAGAACCACTGTGAACACCATAACG         |
| CYC1-Rev               | TTTCCCGGGGGATCCACTAGTATGGATATGTATTTGTCAGTTGTATTG |
| YPS11-Fwd              | CTCTGGCTAAGAGGGCTGACG                            |
| YPS11-Rev              | CGTAACGGTTGTGGTCAACGG                            |
| VPK1-Fwd               | ACCAAAGGGTCCATCTAGATTCTC                         |
| VPK1-Rev               | TGAACTTGTAAGGGTCACTGACG                          |
| pU1-XTAG               | GCTCGTCCACGAGGTCTCTGCGTAGCTAGCTAGCTGA            |
| pD1-XTAG               | TCACCGGTACGCCGGTACGTCAGCTAGCTAGCTACGC            |
| pS1-HIS3               | GATCCTGGAGTGTATAGGGGAC                           |
| pAS-HIS3               | CCTATACACTCCAGGATCAGAGAC                         |
| pAU2-ADE2              | GGAAATCTACCCTACGCCTG                             |
| pAD2-ADE2              | GCACAAGTGGCACACATTG                              |
| pS1-HD ADE2            | CGATGGAAGAGGCAACTTTG                             |
| pAS-HD ADE2            | TAGGCTAATGTTCTTGATTCAAGAC                        |
| pAU3-ADE2              | CAAAGTTGCCTCTTCCATCGGAAAAATTTTCACCTGGGGTTCG      |
| pAD3-ADE2              | AAATCAAGAACATTAGCCTACTGTCAAACAATGCACGCAAG        |
| pSeqHIS3-Fwd           | AATCAGCTTTCAAGGCGCTC                             |
| pSeqHIS3-Rev           | AAATCAGAAGGCATCCGCAG                             |
| VPK1-HIS3-Fwd          | TTGGTCCAAGAATACTGCGACTGTCAAACAATGCACGCAAG        |
| VPK1-HIS3-Rev          | AGTCGTAGAAGTCACCACACAAAAATTTTCACCTGGGGTTCGC      |

3

4

1 **Supplementary Figure S1. Sequences of regulatory elements**

2  
3  
4  
5  
6  
7  
8  
9  
10  
11  
12  
13  
14  
15  
16  
17  
18  
19  
20  
21  
22  
23  
24  
25  
26  
27  
28  
29  
30  
31  
32  
33  
34  
35  
36  
37  
38  
39  
40

*Candida glabrata* *CYC1* promoter:

TAGAACTAGTGGATCCCCCACTGTGAACACCATAACGGCTTTCGTCGTCGAACTAAACCCTCCTG  
TTCTTGAAACCCGATACGTTGGATAGTATAGAAAGGGCACACAACCTCACGATACTATTCCCGAAA  
CAGCAGTTTGTATGGGAAGCCCCCTACACTTGAGCCCTGGAAGTGATATTCTTAGCTCTCTACAA  
GGAGGTCCTCTCAGTGGGTCTGGCAGTGGGTCTCTGAGTGACCTTCCCAGTACATCTCCCGGTA  
TCTTTTCCAGTACCTCTCCCAGTACATCTCCCGGTGGCTTTCAAATAGTGTATTGAACAAGGAGTA  
CGAGGGAGTTATCGGGATACCGGCTTGCCCAATAGGATCAAATATCACTGTAAGGGACCATCCC  
GTTACTGGACCTATCAGTAGTTAATAGACTTGTAATGCTCTAAGGGGATCAAAGAAGTCAATCCC  
GCAAAAAATTTTTACTGGCAATACCGGAGGTAAGTCTCGAGGATTGAGACTTCTCTATTTGTATAT  
AAATATCCACTCAACTCTCGACACATTCATACCCACCTCTTGGACTTCGAATTCTTGTCTTGCAAT  
CTTGTTCCAGCCAGAATCATAAACAAACAATACTGACAAATACATATCCATACCGGG

*Candida glabrata* *CYC1* terminator:

ATTAGTTATGTCACGCTTACATTCACGCCCTCCCCCACATCCGCTCTAACCAGAAAAGGAAGGAG  
TTAGACAACCTGAAGTCTAGGTCCCTATTTATTTTTTATAGTTATGTTAGTATTAAGAACGTTATT  
TATATTTCAAATTTTTCTTTTTTTCTGTACAGACGCGTGTACGCATGTAACATTATACTGAAAACC  
TTGCTTGAGAAGTTTTGGGACGCTCGAAGGCTTTAATTTG

*Candida glabrata* *RNAH1* promoter:

CCATTAGATAGATATTGGGGCCATCTTAAAAAGTCCCTACGATGCTCTGTTAGGACCCTCAGTGG  
TTCAGTGGTTTTTTGAAGCTTCCCCTTCATAGGGGCGACTTCCAGGGCCATTGTACGAATGGAAG  
TGTTAACTTTTTGAAGCCACTATTTAAAGAGGGAACGATCCAGAGTTCGAAAC

*Candida glabrata* *TY2* terminator:

TTTTTTTCTTATTTTTTTGT

*Saccharomyces cerevisiae* *SNR52* promoter:

TCTTTGAAAAGATAATGTATGATTATGCTTTCCTCATATTTATACAGAACTTGATGTTTTCTTTC  
GAGTATATACAAGGTGATTACATGTACGTTTGAAGTACAACCTCTAGATTTTGTAGTGCCCTCTTGG  
GCTAGCGGTAAGGTGCGCATTTTTTTCACACCCTACAATGTTCTGTTCAAAGATTTTGGTCAAAC  
GCTGTAGAAGTGAAAGTTGGTGCATGTTTCGGCGTTTCGAACTTCTCCGCAGTGAAAGATAAA  
TGATC

*Saccharomyces cerevisiae* *TY2* terminator:

TTTTTTTGTATTTTATGTCT

1 Structural guiding RNA:  
2 GTTTTAGAGCTAGAAATAGCAAGTTAAAATAAGGCTAGTCCGTTATCAACTTGAAAAAGTGGCAC  
3 CGAGTCGGTGGTGC

4  
5

6 **Supplementary Figure S2. sgRNA sequences**

7

8 ADE2.1: TCAAGAACATTAGCCTACGA

9 ADE2.3: CATCACTGTTGAAAATTCGA

10 *YPS1*: TACCTGGGGTACTGACCAGG

11 *VPK1*: GTCCAAGAATACTGCGAGTG

12



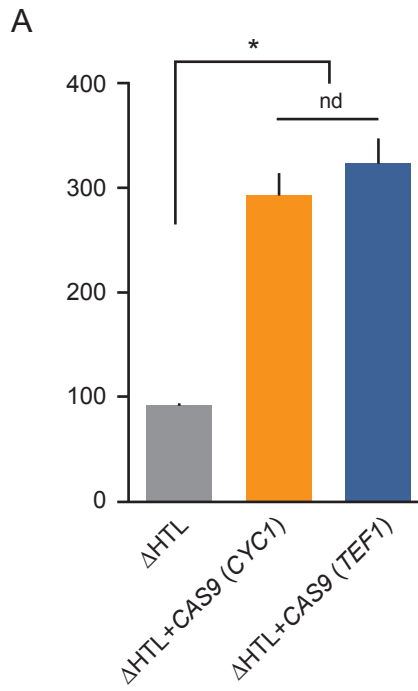

Supplementary Figure S3. Mean generation time analysis of CAS9 expressing strains. (A) Cells were grown in SCGlc 2% with ( $\Delta$ HTL) or without tryptophan ( $\Delta$ HTL+CAS9 (CYC1) and  $\Delta$ HTL+CAS9 (TEF1)). Generation times were measured during exponential phase for each strain. \* t-test  $p < 0.001$  ; nd: not different,  $n=3$ , SEM are shown.

**A**

**XTAG (57bp)**: GCTCGTCCACGAGGTCTCTGCG**TAGCTAGCTAGCT**GACGTACCGGCGTACCGGTGA

|                                    |                                                                                                              |                        |            |                                    |
|------------------------------------|--------------------------------------------------------------------------------------------------------------|------------------------|------------|------------------------------------|
|                                    |                                                                                                              | <b>sgADE2.1 target</b> | <b>PAM</b> |                                    |
| <i>In silico</i> reference (5'-3') | TTAAACAGGATCCTCATTGGGTTACCCATTTGTCTTGAAATCAAGAACATTAGCCTACGATGGG                                             |                        |            | AAGAGGCAACTTGTGTTAAATCTGAAGAAGACAT |
|                                    |                                                                                                              |                        |            | <b>XTAG</b>                        |
| <i>In silico</i> after insertion   | TTAAACAGGATCCTCATTGGGTTACCCATTTGTCTTGAAATCAAGAACATTAGCCTAGCTCGTCCACGAGGTCTCTGCG <b>TAGCTAGCTAGCT</b> GACGTAC |                        |            |                                    |
| Clone 1                            | TTAAACAGGATCCTCATTGGGTTACCCATTTGTCTTGAAATCAAGAACATTAGCCTAGCTCGTCCACGAGGTCTCTGCG <b>TAGCTAGCTAGCT</b> GACGTAC |                        |            |                                    |
| Clone 2                            | TTAAACAGGATCCTCATTGGGTTACCCATTTGTCTTGAAATCAAGAACATTAGCCTAGCTCGTCCACGAGGTCTCTGCG <b>TAGCTAGCTAGCT</b> GACGTAC |                        |            |                                    |
| Clone 3                            | TTAAACAGGATCCTCATTGGGTTACCCATTTGTCTTGAAATCAAGAACATTAGCCTAGCTCGTCCACGAGGTCTCTGCG <b>TAGCTAGCTAGCT</b> GACGTAC |                        |            |                                    |

  

|                                    |                                                           |            |                        |                                                  |
|------------------------------------|-----------------------------------------------------------|------------|------------------------|--------------------------------------------------|
|                                    |                                                           | <b>PAM</b> | <b>sgADE2.1 target</b> |                                                  |
| <i>In silico</i> reference (3'-5') | CAAGTCCTTTCTCAATGTCTTCTTCAGATTTAACAACAAAGTTGCCTCTTCCATCGT |            |                        | CAACCGGTACGCCGGTACGTCAGCTAGCTAGCTAGCTACGCAGAGACC |
|                                    |                                                           |            |                        | <b>XTAG</b>                                      |
| <i>In silico</i> after insertion   | CAAGTCCTTTCTCAATGTCTTCTTCAGATTTAACAACAAAGTTGCCTCTTCCATCGT |            |                        | CAACCGGTACGCCGGTACGTCAGCTAGCTAGCTAGCTACGCAGAGACC |
| Clone 1                            | CAAGTCCTTTCTCAATGTCTTCTTCAGATTTAACAACAAAGTTGCCTCTTCCATCGT |            |                        | CAACCGGTACGCCGGTACGTCAGCTAGCTAGCTAGCTACGCAGAGACC |
| Clone 2                            | CAAGTCCTTTCTCAATGTCTTCTTCAGATTTAACAACAAAGTTGCCTCTTCCATCGT |            |                        | CAACCGGTACGCCGGTACGTCAGCTAGCTAGCTAGCTACGCAGAGACC |
| Clone 3                            | CAAGTCCTTTCTCAATGTCTTCTTCAGATTTAACAACAAAGTTGCCTCTTCCATCGT |            |                        | CAACCGGTACGCCGGTACGTCAGCTAGCTAGCTAGCTACGCAGAGACC |

**B**

**HIS3 (1202bp)**: CTGTCAAACAATGCACGCAAGATCGTAAATCAGATACTTGGAAAAAGAAAGAAAGAAATCCATGAACCAGGAGGGGCGG  
 AGGAACACATAACACCGATCAACGTACAGTGGTATAGTACACATGTTCTATCACTAGTAACGTAACAATCAAATCGCCC  
 GAAAATGGCGAGGAAAATGACTCAGAAAAGTTGAAATTCCTCAGAAAAGACCGTAGACCCTGCATGATGACACATCGGGC  
 AGCGAAAGGCGCGGAATTTCTGGCCGAGTCACCCAGCTCTATATGTATATAAAGCTGCGGATGCCTTCTGATTTAATC  
 TAGTTCTAGTTTACTTTCAGGTTTACTTAAAGTTGAGATAATTGAAGCAAAGAGAAGCATCGAGCAAAGGATGGCGTTT  
 TTAAGAGGGTTACGCAGGAGACGAATATACAGCTGGCGCTGGATCTTGACGGTGGGTCTGTTTCTGTACGGGAGAGCAT  
 ACTGGGCAAGGAATATGCTAGTGGTGTATGGGAGACCATCCATGTGCACACTGGAGTTGGGTTTTTGGACCACATGTTG  
 ACTGCGCTGGCGAAGCATGGCGGGTGGTCTCTGATCCTGGAGTGTATAGGGGACTTGCACATCGATGACCACCACACTG  
 TTGAGGACTGTGGGATTTGCGCTGGGCCAAGCGTTCAAGGAGGCGCTTGGCTCCGTGCGTGGTATCAAGAGGTTCCGGCA  
 TGGGTTTGCACCCTGGACGAGGCGCTGAGCCGCGCTGTGGTTGACTTCTCCAATAGGCCCTTTCGCCGTGGTGGAGCTG  
 GGCTGAAGCGAGAACGCATAGGCCAGCTATCCACAGAGATGATCCCGCACTTCTTGAGAGTTTTGCCACTGAGGCGC  
 GTATCACCATGCATGTGGACTGTCTGCGGGGCACCAACGACCACCACCGCTCCGAATCAGCTTTCAAGGCGCTCGCCAT  
 CGCCATCAGAGAGGCAAGAACACCTACGGGTGCGGATGACGTTCCATCCACTAAGGTTGCTCTAGCATAGAACACAGCC  
 CACAGCTACCACATCAACAATATTTATATAGATAACGTACACATAGAAATCACACAAACAGAGTATTTATTCTTAACT  
 ACATGAACCTACCATCAGACCGTCTGGGCCACTATATAATGTGCTATTCATAAACGTTGATCACTCTACGTAGCAGGCGAC  
 CCCAGGTGAAAATTTTTT

|                                    |                                                                                                      |                        |            |                                    |
|------------------------------------|------------------------------------------------------------------------------------------------------|------------------------|------------|------------------------------------|
|                                    |                                                                                                      | <b>sgADE2.1 target</b> | <b>PAM</b> |                                    |
| <i>In silico</i> reference (5'-3') | TTAAACAGGATCCTCATTGGGTTACCCATTTGTCTTGAAATCAAGAACATTAGCCTACGATGGG                                     |                        |            | AAGAGGCAACTTGTGTTAAATCTGAAGAAGACAT |
|                                    |                                                                                                      |                        |            | <b>HIS3</b>                        |
| <i>In silico</i> after insertion   | TTAAACAGGATCCTCATTGGGTTACCCATTTGTCTTGAAATCAAGAACATTAGCCTAGCTCGTCAAACAATGCACGCAAGATCGTAAATCAGATACTTGA |                        |            |                                    |
| Clone 1                            | TTAAACAGGATCCTCATTGGGTTACCCATTTGTCTTGAAATCAAGAACATTAGCCTAGCTCGTCAAACAATGCACGCAAGATCGTAAATCAGATACTTGA |                        |            |                                    |
| Clone 2                            | TTAAACAGGATCCTCATTGGGTTACCCATTTGTCTTGAAATCAAGAACATTAGCCTAGCTCGTCAAACAATGCACGCAAGATCGTAAATCAGATACTTGA |                        |            |                                    |

  

|                                    |                                                           |            |                        |                                                  |
|------------------------------------|-----------------------------------------------------------|------------|------------------------|--------------------------------------------------|
|                                    |                                                           | <b>PAM</b> | <b>sgADE2.1 target</b> |                                                  |
| <i>In silico</i> reference (3'-5') | CAAGTCCTTTCTCAATGTCTTCTTCAGATTTAACAACAAAGTTGCCTCTTCCATCGT |            |                        | CAACCGGTACGCCGGTACGTCAGCTAGCTAGCTAGCTACGCAGAGACC |
|                                    |                                                           |            |                        | <b>HIS3</b>                                      |
| <i>In silico</i> after insertion   | CAAGTCCTTTCTCAATGTCTTCTTCAGATTTAACAACAAAGTTGCCTCTTCCATCGT |            |                        | CAACCGGTACGCCGGTACGTCAGCTAGCTAGCTAGCTACGCAGAGACC |
| Clone 1                            | CAAGTCCTTTCTCAATGTCTTCTTCAGATTTAACAACAAAGTTGCCTCTTCCATCGT |            |                        | CAACCGGTACGCCGGTACGTCAGCTAGCTAGCTAGCTACGCAGAGACC |
| Clone 2                            | CAAGTCCTTTCTCAATGTCTTCTTCAGATTTAACAACAAAGTTGCCTCTTCCATCGT |            |                        | CAACCGGTACGCCGGTACGTCAGCTAGCTAGCTAGCTACGCAGAGACC |

Supplementary Figure S4. *XTAG* and *HIS3* insertion cassettes and sequences alignments after recombination. (A) Sequence of the *XTAG* cassette. After transformation and recovery on SCGlc 2% -L -W, 3 clones were sequenced. Both ends of the insertions are shown and sequences were compared to the *in silico* reference. (B) Sequence of the *HIS3* cassette. After transformation and recovery on SCGlc 2% -L -W, 2 clones were sequenced. Both ends of the insertions are shown and sequences were compared to the *in silico* reference.

A

*yps11* strain

sgYPS11
Cut site
PAM

*In silico* ATATGTTGAAGGTACCTGGGGTACTGACC--AGGTGGCATTGGCAGGAC  
 $\Delta$ HTL ATATGTTGAAGGTACCTGGGGTACTGACC--AGGTGGCATTGGCAGGAC  
*yps11* ATATGTTGAAGGTACCTGGGGTACTGACCAAAGGTGGCATTGGCAGGAC

Translation after cut with Cas9 + sgYPS11

Protein sequence ➤ T D F F I T Y G D G S Y V E G T W G T D  
 DNA sequence ➤ ACTGACTTCTTCATCACTTATGGTGACGGTTCATATGTTGAAGGTACCTGGGGTACTGAC

Q R W H W Q D R L W R M S L L L S Q S \*  
 CAAAGGTGGCATTGGCAGGACAGACTTTGGAGAATGTCACITTTGCTGTCGAGATTGA

L T T V T V C W V S V Y L N \* N P A S L  
 CTAACAACAGTTACGGTCTGTTGGGTATCGGTCTACCTGAATTAGAATCCAGCATCACTA

S I L L N \* Q T L Q V L R R T H T \* I S  
 TCGATACTGCTCAATTGACAAACACTTCAAGTGTAAAGAAGAACCATACATGAATTTC

B

*vpk1* strain

sgVPK1
Cut site
PAM

*In silico* AATTACACTTTGGTCCAAGAATACTGCGA-GTGTGGTGACTTCTACGA  
 $\Delta$ HTL AATTACACTTTGGTCCAAGAATACTGCGA-GTGTGGTGACTTCTACGA  
*vpk1* AATTACACTTTGGTCCAAGAATACTGCGAAGTGTGGTGACTTCTACGA

Translation after cut with Cas9 + sgVPK1

Protein sequence ➤ S K F S Q R G M A N E Y N V G K L L S K  
 DNA sequence ➤ TCTAAATCTCTCAAAGAGGTATGGCTAATGAATACAACGTTGGCAAGTTATTGTCTAAG

D E G C P F I C S F V D F Y E D E T N Y  
 GATGAAGGTTGTCCTTCATTTGCTCCTTCGTGGATTCTACGAGGATGAGACTAATTAC

T L V Q E Y C E V W \* L L R L L G I V \*  
 ACTTTGGTCCAAGAATACTGCGAAGTGTGGTGACTTCTACGACTTCTTGGAAATTGTCTAA

E E R \* P K C S L D H \* I E L S K S C L  
 GAAGAAAGGTGACCTAAATGCTCCTCGATCATTAATTAAGTCTTCAAAAAGTTGTCTT

C

*yps11* strain

sgYPS11
Cut site
PAM

*In silico* ATATGTTGAAGGTACCTGGGGTACTGACC--AGGTGGCATTGGCAGGAC  
 $\Delta$ HTL ATATGTTGAAGGTACCTGGGGTACTGACC--AGGTGGCATTGGCAGGAC  
*yps11* ATATGTTGAAGGTACCTGGGGTACTGACCAAAGGTGGCATTGGCAGGAC  
*yps11* after CFU #1 ATATGTTGAAGGTACCTGGGGTACTGACCAAAGGTGGCATTGGCAGGAC  
*yps11* after CFU #2 ATATGTTGAAGGTACCTGGGGTACTGACCAAAGGTGGCATTGGCAGGAC

D

*vpk1* strain

sgVPK1
Cut site
PAM

*In silico* AATTACACTTTGGTCCAAGAATACTGCGA-GTGTGGTGACTTCTACGA  
 $\Delta$ HTL AATTACACTTTGGTCCAAGAATACTGCGA-GTGTGGTGACTTCTACGA  
*vpk1* AATTACACTTTGGTCCAAGAATACTGCGAAGTGTGGTGACTTCTACGA  
*vpk1* after CFU #1 AATTACACTTTGGTCCAAGAATACTGCGAAGTGTGGTGACTTCTACGA  
*vpk1* after CFU #2 AATTACACTTTGGTCCAAGAATACTGCGAAGTGTGGTGACTTCTACGA

Supplementary Figure S5. Analysis of *YPS11* and *VPK1* disruption and confirmation of clones after infection of *D. melanogaster*. (A) Based on sequencing after *YPS11* disruption, translation of the *YPS11* ORF was done on the APE software. NHEJ-inserted nucleotides are highlighted in green. The resulting premature STOP codons, represented by an asterisk, are highlighted in red. (B) Based on sequencing after *VPK1* disruption, translation of the *VPK1* ORF was done on the APE software. NHEJ-inserted nucleotides are highlighted in green. The resulting premature STOP codons, represented by an asterisk, are highlighted in red. (C-D) *YPS11* and *VPK1* cells recovered from CFU experiments after infection were resequenced. Two clones from each experiment were sequenced.

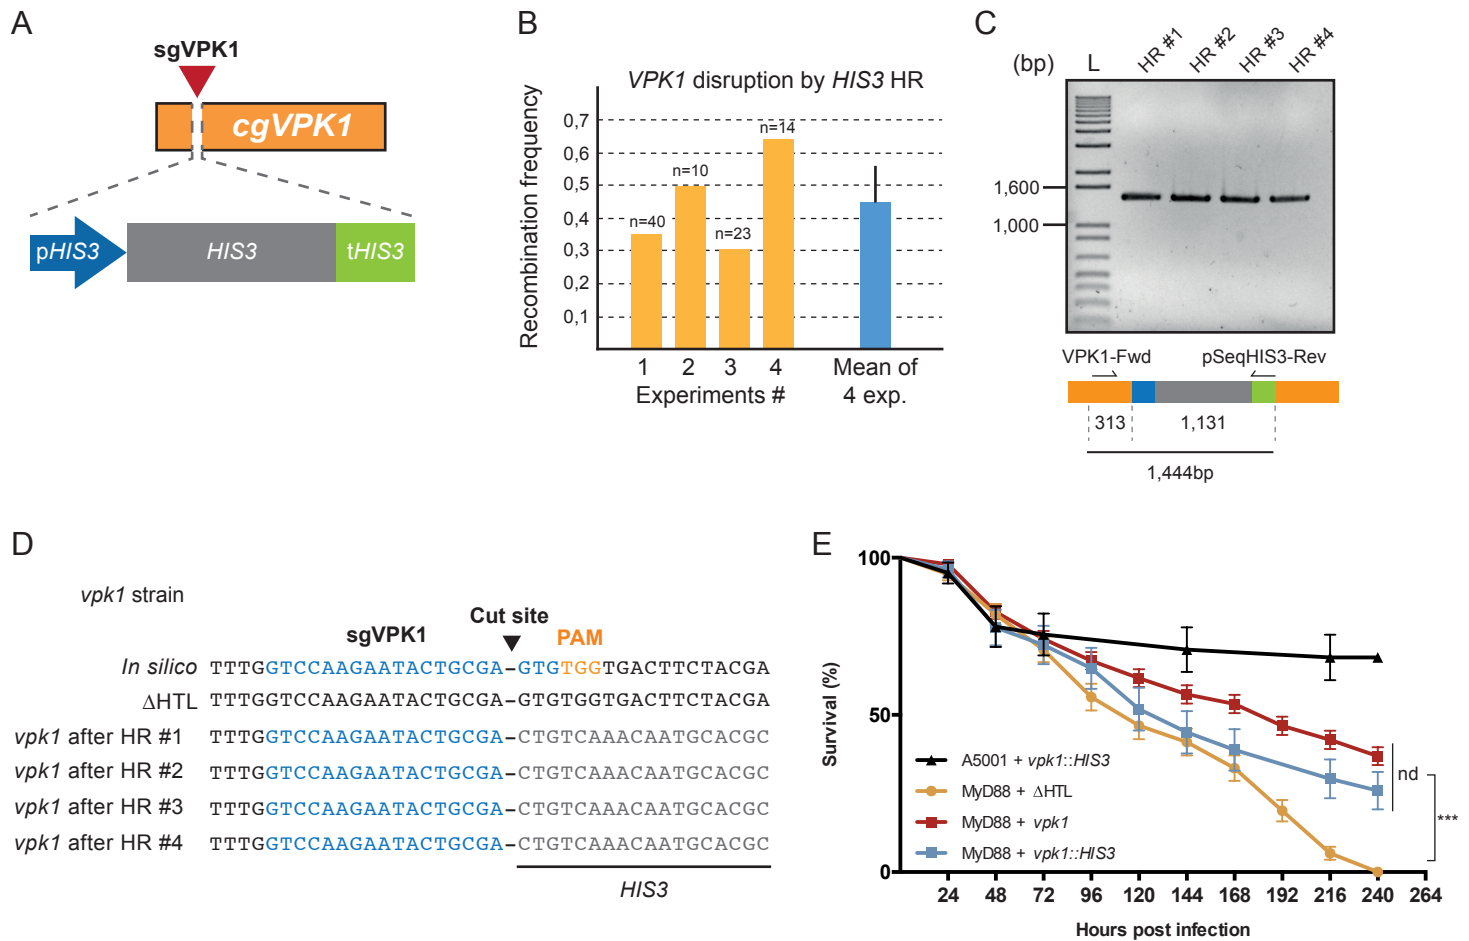

Supplemental Figure S6. *Vpk1* cells disrupted by HR display the same pathogenicity than NHEJ-disrupted *vpk1* cells. (A) Schematic of the strategy used to disrupt *VPK1* with the *HIS3* cassette. (B) Measurement of *VPK1* disruption by the *HIS3* cassette. Four experiments were conducted independently and clones recovered on SCGlc 2% -L-W-H were checked for *HIS3* insertion at *VPK1* locus by PCR. (C) Among the different disruptants obtained, we took four independent clones and checked efficient disruption and *HIS3* insertion by PCR. Primers used are described below and were chosen to amplify a 1,444bp region. Amplicons obtained by PCR were then sequenced with the *VPK1*-Fwd primer (D). Each clone presents efficient disruption and *HIS3* insertion at the site of sgVPK1 cut. (E) One *vpk1::HIS3* mutant was used to perform drosophila infection and tested for virulence. In WT A5001 flies, *vpk1::HIS3* cells infection is controlled (black lines) whereas it kills 74% of MYD88 flies (blue lines). This is not statistically different than the NHEJ-*vpk1* disruptants we created previously (red lines ; see Figure 5 in our manuscript), but is statistically different than infection with the  $\Delta$ HTL cells (orange lines). \*\*\*  $p$  val < 0,001.
